# Supplementary material
Source: PubMed Central journal article supplement (PMC10571093)
Supplement: NIHMS1922455-supplement-Supplemental_Appendix.pdf [file NIHMS1922455-supplement-Supplemental_Appendix.pdf]

# Mortality and immune-related adverse events after immune checkpoint inhibitor initiation for cancer among patients with pre-existing rheumatoid arthritis: A retrospective comparative cohort study

## Supplemental material:

**Supplemental Figure 1.** Flow diagram of analyzed study sample.

**Supplemental Table 1.** ICD-9 and ICD-10 codes used to identify potential patients with pre-existing rheumatoid arthritis for cases (inflammatory arthritis category) and to exclude pre-existing rheumatic diseases from potential comparators (all categories).

**Supplemental Table 2.** Duration and number of ICI infusions for pre-existing RA cases and non-RA comparators.

**Supplemental Table 3.** Baseline characteristics of pre-existing RA cases (n=87) and pre-RA cases without matches (n=14) at index date of immune checkpoint inhibitor initiation.

**Supplemental Table 4.** RA characteristics of cases in analysis (n=87) and those without matches (n=14) at index date of immune checkpoint inhibitor initiation.

**Supplemental Table 5.** Cancer characteristics stratified by index date before 2016 vs. 2016 or later among pre-existing RA cases (n=87).

**Supplemental Table 6.** Cancer characteristics stratified by index date before 2016 vs. 2016 or later among non-RA comparators (n=87). **Supplemental Table 7.** Hazard ratios for mortality after immune checkpoint inhibitor initiation, comparing pre-existing RA cases (n=87) and matched non-RA comparators, index date before 2016 (n=203).

**Supplemental Table 8.** Hazard ratios for mortality after immune checkpoint inhibitor initiation, comparing pre-existing RA cases (n=87) and matched non-RA comparators, index date 2016 or later (n=203).

**Supplemental Table 9.** Glucocorticoid and DMARD use at any time after index date of ICI initiation.

**Supplemental Table 10.** Hazard ratios for mortality after immune checkpoint inhibitor initiation by baseline factors.

**Supplemental Figure 2.** Histogram comparing number of all-grade irAE for pre-existing RA cases and non-RA comparators after excluding RA flares for cases and IA events for comparators.

**Supplemental Table 11.** Hazard ratios for mortality after immune checkpoint inhibitor initiation comparing RA cases and matched comparators among only males.

**Supplemental Table 12.** Hazard ratios for mortality after immune checkpoint inhibitor initiation comparing RA cases and matched comparators among only females.

**Supplemental Table 13.** Hazard ratios for mortality after immune checkpoint inhibitor initiation comparing RA cases and matched comparators among only lung cancer.

**Supplemental Table 14.** Hazard ratios for mortality after immune checkpoint inhibitor initiation comparing RA cases and matched comparators among only melanoma.

**Supplemental Table 15.** Hazard ratios for mortality after immune checkpoint inhibitor initiation comparing RA cases and matched comparators among only seropositive RA cases and their comparators.

**Supplemental Table 16.** Hazard ratios for mortality after immune checkpoint inhibitor initiation comparing RA cases and matched comparators among only seronegative RA cases and their comparators.

**Supplemental Table 17.** Hazard ratios for mortality after immune checkpoint inhibitor initiation comparing RA cases and matched comparators only among baseline glucocorticoids users (n=57) and their comparators.

**Supplemental Table 18.** Hazard ratios for mortality after immune checkpoint inhibitor initiation comparing RA cases and matched comparators only among baseline non-glucocorticoids users (n=30) and their comparators.

**Supplemental Table 19.** Risk of all-grade irAE after immune checkpoint inhibitor initiation only among baseline glucocorticoids users (n=57) and their comparators.

**Supplemental Table 20.** Risk of all-grade irAE after immune checkpoint inhibitor initiation only among baseline non-glucocorticoids users (n=30) and their comparators.

**Supplemental Table 21.** Risk of all-grade irAE after immune checkpoint inhibitor initiation only among RA cases with moderate/high disease activity (n=14) as baseline (and their comparators).

**Supplemental Table 22.** Risk of all-grade irAE after immune checkpoint inhibitor initiation only among RA cases with remission/low disease activity (n=54) as baseline (and their comparators).

**Supplemental Table 23.** Risk of all-grade irAE after immune checkpoint inhibitor initiation only among males.

**Supplemental Table 24.** Risk of all-grade irAE after immune checkpoint inhibitor initiation only among females.

**Supplemental Table 25.** Risk of grade 3+ irAE after immune checkpoint inhibitor initiation only among males.

**Supplemental Table 26.** Risk of grade 3+ irAE after immune checkpoint inhibitor initiation only among females.

**Supplemental Table 27.** Risk of all-grade irAE after immune checkpoint inhibitor initiation excluding RA and flare and IA, only among males.

**Supplemental Table 28.** Risk of all-grade irAE after immune checkpoint inhibitor initiation excluding RA and flare and IA, only among females.

**Supplemental Table 29.** Risk of grade 3+ irAE after immune checkpoint inhibitor initiation excluding RA and flare and IA, only among males.

**Supplemental Table 30.** Risk of grade 3+ irAE after immune checkpoint inhibitor initiation excluding RA and flare and IA, only among females.

**Supplemental Figure 1.** Flow diagram of analyzed study sample.

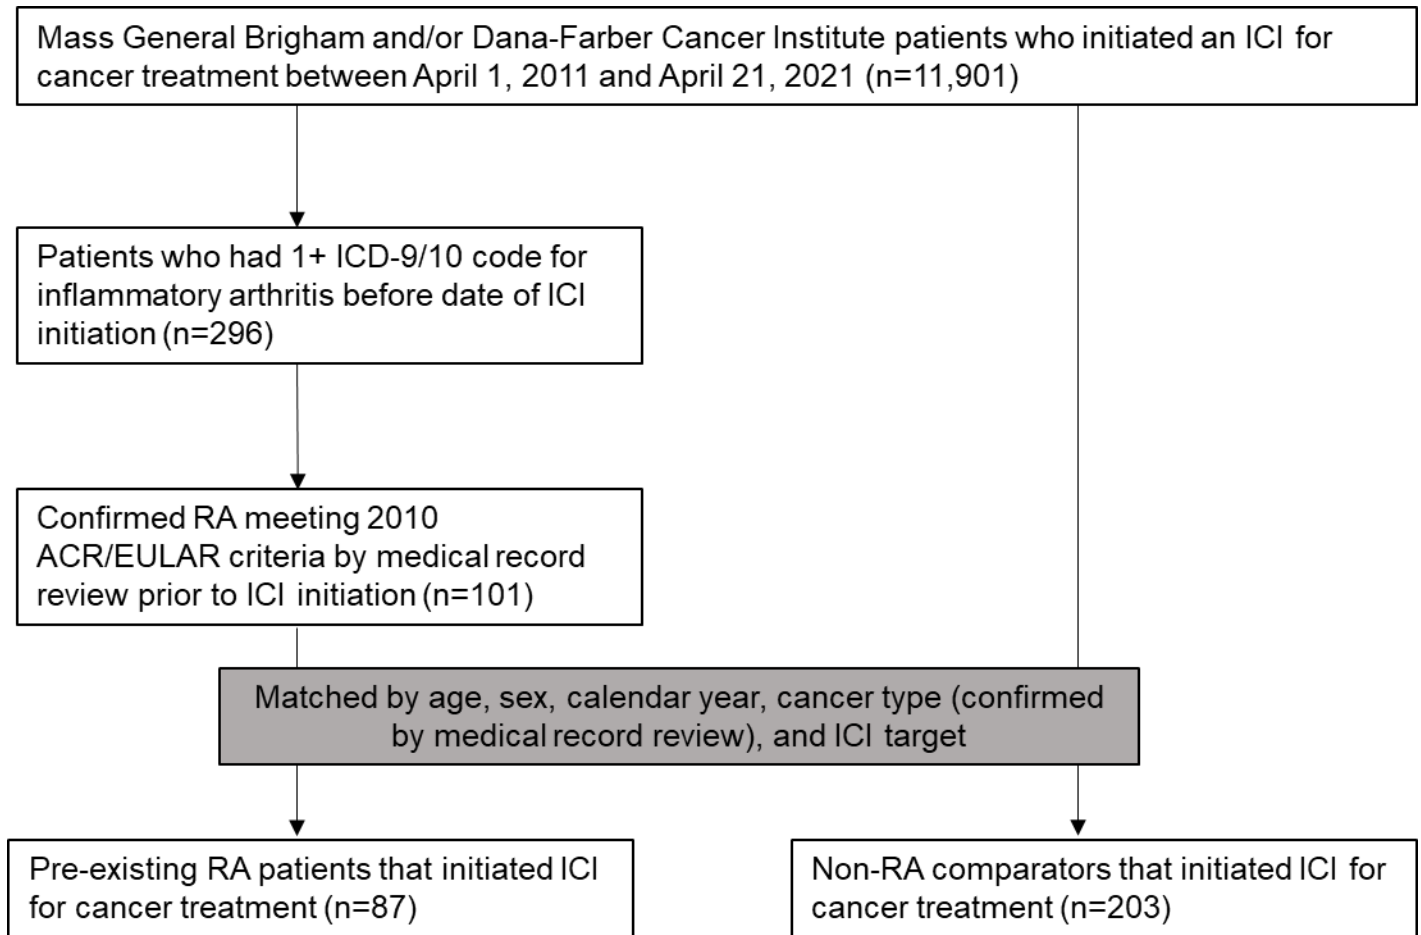

**Supplemental Table 1.** ICD-9 and ICD-10 codes used to identify potential patients with pre-existing rheumatoid arthritis for cases (inflammatory arthritis category) and to exclude pre-existing rheumatic diseases from potential comparators (all categories).

| Category               | Rheumatic disease (ICD codes)                                                                                                                                                                                                                                                                                                                                                                                                                                      |
|------------------------|--------------------------------------------------------------------------------------------------------------------------------------------------------------------------------------------------------------------------------------------------------------------------------------------------------------------------------------------------------------------------------------------------------------------------------------------------------------------|
| Inflammatory arthritis | <ul style="list-style-type: none"> <li>● Rheumatoid arthritis<br/>M05%<br/><br/>M06%<br/><br/>714%</li> <li>● Inflammatory arthritis or inflammatory polyarthropathy M06.4<br/>714.89<br/><br/>714.9</li> <li>● Juvenile idiopathic arthritis<br/>M08.20<br/><br/>714.3</li> <li>● Psoriatic arthritis or arthropathic psoriasis<br/>L40.50<br/><br/>696.0</li> <li>● Ankylosing spondylitis<br/>M45.9<br/><br/>720.0</li> </ul>                                   |
| Vasculitis             | <ul style="list-style-type: none"> <li>● ANCA-associated vasculitis: granulomatosis with polyangiitis, eosinophilic granulomatosis with polyangiitis, microscopic polyangiitis<br/>M31.3<br/><br/>M31.7<br/><br/>M30.0<br/><br/>446.0<br/><br/>446.4<br/><br/>446.7<br/><br/>447.6</li> <li>● Kawasaki disease<br/>M30.3<br/><br/>446.1</li> <li>● Takayasu arteritis<br/>M31.4<br/><br/>446.7</li> <li>● Polyarteritis nodosa<br/>M30.0<br/><br/>446.0</li> </ul> |

|                                   |                                                                                                                                                                                                                                                                                                                                                                                                                                                                                                                                                                                                         |
|-----------------------------------|---------------------------------------------------------------------------------------------------------------------------------------------------------------------------------------------------------------------------------------------------------------------------------------------------------------------------------------------------------------------------------------------------------------------------------------------------------------------------------------------------------------------------------------------------------------------------------------------------------|
|                                   | <ul style="list-style-type: none"> <li>● Giant cell arteritis/polymyalgia rheumatica<br/>M31.6<br/><br/>446.5<br/><br/>M35.3<br/><br/>725%</li> <li>● Behçet's disease<br/>M35.2<br/><br/>136.1</li> <li>● Unspecified arteritis<br/>I77.6<br/><br/>447.6</li> </ul>                                                                                                                                                                                                                                                                                                                                    |
| Other systemic rheumatic diseases | <ul style="list-style-type: none"> <li>● Systemic lupus erythematosus<br/>M32%<br/><br/>710.0</li> <li>● Sjögren's syndrome<br/>M35.0<br/><br/>710.2</li> <li>● Idiopathic inflammatory myositis: dermatomyositis, polymyositis, statin-associated autoimmune myositis, unspecified myositis<br/>G72.49<br/><br/>G72.41<br/><br/>M33<br/><br/>710.3<br/><br/>710.4</li> <li>● Systemic sclerosis<br/>M34.0<br/><br/>M34.1<br/><br/>M34.8%<br/><br/>M34.9<br/><br/>710.1</li> <li>● CREST syndrome<br/>M34.1<br/><br/>710.1</li> <li>● Dermatomyositis/polymyositis<br/>M33.9<br/><br/>M33.10</li> </ul> |

M33.2

710.3

710.4

- Mixed connective tissue disease  
M35.1

710.9

- Antiphospholipid syndrome  
D68.61

239.81

- Sarcoidosis  
D86.0

D86.9

135%

- IgG4-related disease  
M35

- Still's disease  
M08.2

714.3

- Raynaud's phenomenon  
I73.0

ICD, International Classification of Diseases 9th or 10th revision codes.

\*"% " means "wildcard" - any text appearing after the initial string are captured in the coding. For example, M05% includes every sub-classification under M05 (M05.1, M05.2, etc.).

**Supplemental Table 2.** Duration and number of ICI infusions for pre-existing RA cases and non-RA comparators.

|                                   | <b>RA cases</b> | <b>Non-RA comparators</b> | <b>p-value</b> |
|-----------------------------------|-----------------|---------------------------|----------------|
| Median ICI duration, months (IQR) | 4 (1, 11)       | 4 (1, 11)                 | 0.96           |
| Median ICI number (IQR)           | 6 (2, 13)       | 5.5 (2, 13)               | 0.38           |

**Supplemental Table 3.** Baseline characteristics of pre-existing RA cases (n=87) and pre-RA cases without matches (n=14) at index date of immune checkpoint inhibitor initiation.

|                                                 | <b>Pre-existing RA cases in analysis (n=87)</b> | <b>Pre-existing RA cases without matches (n=14)</b> | <b>p-value</b> |
|-------------------------------------------------|-------------------------------------------------|-----------------------------------------------------|----------------|
| <b>Demographics</b>                             |                                                 |                                                     |                |
| Mean age, years (SD)                            | 69.9 (10.6)                                     | 71.6 (11.6)                                         | 0.58           |
| Female sex, n (%)                               | 52 (59.8%)                                      | 11 (78.6%)                                          | 0.10           |
| Race, n (%)                                     |                                                 |                                                     |                |
| White                                           | 81 (93.1%)                                      | 14 (100.0%)                                         | 0.40           |
| Black                                           | 3 (3.5%)                                        | 0 (0.0%)                                            | 0.64           |
| Asian                                           | 1 (1.2%)                                        | 0 (0.0%)                                            | 0.86           |
| Median calendar year (IQR)                      | 2018 (2017, 2019)                               | 2019.5 (2019, 2020)                                 | 0.0063         |
| <b>Lifestyle</b>                                |                                                 |                                                     |                |
| Smoking status, n (%)                           |                                                 |                                                     |                |
| Never                                           | 24 (27.6%)                                      | 4 (28.6%)                                           | 0.99           |
| Past                                            | 57 (65.5%)                                      | 9 (64.3%)                                           |                |
| Current                                         | 6 (6.9%)                                        | 1 (7.1%)                                            |                |
| Median pack-years (IQR)                         | 20 (0, 40)                                      | 20 (0, 60)                                          | 0.77           |
| Median body mass index, kg/m <sup>2</sup> (IQR) | 25.8 (22.0, 29.4)                               | 25.4 (23.4, 31.0)                                   | 0.36           |
| <b>Comorbidities</b>                            |                                                 |                                                     |                |
| Median CCI (IQR)                                | 8 (6, 9)                                        | 9.5 (8, 12)                                         | 0.43           |
| <b>Cancer characteristics</b>                   |                                                 |                                                     |                |
| Target of ICI, n (%)                            |                                                 |                                                     |                |
| PD-1                                            | 80 (92.0%)                                      | 10 (71.4%)                                          | 0.037          |
| PD-L1                                           | 4 (4.6%)                                        | 0 (0.0%)                                            | 0.55           |
| CTLA-4                                          | 1 (1.2%)                                        | 4 (28.6%)                                           | 0.0011         |
| Combination                                     | 2 (2.3%)                                        | 0 (0.0%)                                            | 0.74           |
| Type of cancer, n (%)                           |                                                 |                                                     |                |
| Lung                                            | 43 (49.4%)                                      | 7 (50.0%)                                           | 0.97           |
| Non-small cell                                  | 41 (47.1%)                                      | 0 (0.0%)                                            | 0.0003         |
| Small cell                                      | 2 (2.3%)                                        | 7 (50.0%)                                           | <0.0001        |
| Melanoma                                        | 21 (24.1%)                                      | 0 (0.0%)                                            | 0.029          |
| Genitourinary tract                             | 6 (6.9%)                                        | 3 (21.4%)                                           | 0.088          |
| Gastrointestinal tract                          | 3 (3.5%)                                        | 2 (14.3%)                                           | 0.12           |
| Head and neck                                   | 4 (4.6%)                                        | 0 (0.0%)                                            | 0.55           |
| Hematologic                                     | 3 (3.5%)                                        | 0 (0.0%)                                            | 0.64           |
| Brain                                           | 2 (2.3%)                                        | 0 (0.0%)                                            | 0.74           |
| Other**                                         | 5 (5.8%)                                        | 1 (7.1%)                                            | 0.41           |
| Median cancer duration, years (IQR)             | 0.9 (0.1, 2.4)                                  | 0.8 (0.2, 1.1)                                      | 0.30           |
| Previous chemotherapy, n (%)                    | 53 (60.9%)                                      | 12 (85.7%)                                          | 0.0495         |
| Previous hormonal therapy, n (%)                | 1 (1.2%)                                        | 0 (0.0%)                                            | 0.86           |
| Previous radiation, n (%)                       | 48 (55.2%)                                      | 7 (50.0%)                                           | 0.72           |
| Previous stem cell transplant, n (%)            | 2 (2.3%)                                        | 0 (0.0%)                                            | 0.74           |
| Previous CAR-T therapy, n (%)                   | 0 (0.0%)                                        | 0 (0.0%)                                            | N/A            |

|                                                                                           |             |            |        |
|-------------------------------------------------------------------------------------------|-------------|------------|--------|
| Previous chemotherapy, hormonal therapy, radiation, stem cell transplant, or CAR-T, n (%) | 53 (60.92%) | 12 (85.7%) | 0.0495 |
|-------------------------------------------------------------------------------------------|-------------|------------|--------|

Missing data: race, 2 cases and 7 comparators; BMI, 9 cases and 20 comparators. All other variables had complete data.

\*Age, sex, calendar year, ICI target, and cancer type/stage were matching factors.

\*\*Other cancers included neuroendocrine (2 cases and 2 comparators), Merkel cell carcinoma (2 cases and 3 comparators), and mesothelioma (1 case and 1 comparator).

CAR-T, chimeric antigen receptor T cells; CCI, Charlson Comorbidity Index; CTLA-4, cytotoxic T-lymphocyte-associated protein 4; ICI, immune checkpoint inhibitor; IQR, interquartile range; PD-1, programmed cell death protein 1; PD-L1, programmed death-ligand 1; RA, rheumatoid arthritis; SD, standard deviation.

**Supplemental Table 4.** RA characteristics of cases in analysis (n=87) and those without matches (n=14) at index date of immune checkpoint inhibitor initiation.

|                                     | Pre-existing RA cases in analysis (n=87) | Pre-existing RA cases without matches (n=14) | p-value |
|-------------------------------------|------------------------------------------|----------------------------------------------|---------|
| Median RA duration, years (IQR)     | 9.4 (4.6, 16.5)                          | 12.5 (6.0, 20.6)                             | 0.43    |
| Seropositive, n (%)                 | 49/71 (69.0%)                            | 10/12 (83.3%)                                | 0.29    |
| Anti-CCP+, n (%)                    | 35/57 (61.4%)                            | 6/10 (60.0%)                                 | 0.85    |
| RF+                                 | 37/58 (63.8%)                            | 10/10 (100.0%)                               | 0.032   |
| Most recent disease activity, n (%) |                                          |                                              |         |
| Remission                           | 29/68 (42.6%)                            | 2/10 (20.0%)                                 | 0.10    |
| Low                                 | 25/68 (36.8%)                            | 7/10 (70.0%)                                 | 0.11    |
| Moderate                            | 11/68 (16.2%)                            | 1/10 (10.0%)                                 | 0.33    |
| High                                | 3/68 (4.4%)                              | 0/10 (0.0%)                                  | 0.64    |
| Glucocorticoid (n, %)               | 57 (65.5%)                               | 4 (28.6%)                                    | 0.0086  |
| Any DMARD (n, %)                    | 40 (46.0%)                               | 5 (35.7%)                                    | 0.47    |
| Any csDMARD (n, %)                  | 31 (35.6%)                               | 4 (28.6%)                                    | 0.22    |
| Methotrexate (n, %)                 | 19 (21.8%)                               | 3 (21.4%)                                    | 0.27    |
| Hydroxychloroquine (n, %)           | 11 (12.6%)                               | 2 (14.3%)                                    | 0.31    |
| Any bDMARD or tsDMARD (n, %)        | 22 (25.3%)                               | 1 (7.1%)                                     | 0.11    |
| TNFi (n, %)                         | 10 (11.5%)                               | 0 (0.0%)                                     | 0.21    |
| Interstitial lung disease, n (%)    | 13 (14.9%)                               | 5 (35.7%)                                    | 0.059   |
| Sjogren's syndrome, n (%)           | 0 (0.0%)                                 | 0 (0.0%)                                     | N/A     |
| Rheumatoid vasculitis, n (%)        | 1 (1.2%)                                 | 0 (0.0%)                                     | 0.86    |
| Felty's syndrome, n (%)             | 0 (0.0%)                                 | 0 (0.0%)                                     | N/A     |
| Bone erosions or deformities, n (%) | 27 (31.0%)                               | 6 (42.9%)                                    | 0.38    |

Missing data: serostatus 16; anti-CCP 30; RF status 29; disease activity 19. All other variables had complete data.

Anti-CCP, anti-cyclic citrullinated peptide; bDMARD, biologic disease-modifying antirheumatic drug; csDMARD, conventional synthetic disease-modifying antirheumatic drug; DMARD, disease-modifying antirheumatic drug; IQR, interquartile range; RA, rheumatoid arthritis; RF, rheumatoid factor; tsDMARD, targeted synthetic disease-modifying antirheumatic drug; TNFi, tumor necrosis factor inhibitor.



**Supplemental Table 5.** Cancer characteristics stratified by index date before 2016 vs. 2016 or later among pre-existing RA cases (n=87).

|                                                                                           | <b>Cases before 2016<br/>(n=4)</b> | <b>Cases 2016 or later<br/>(n=83)</b> | <b>p-value</b> |
|-------------------------------------------------------------------------------------------|------------------------------------|---------------------------------------|----------------|
| Median cancer duration, years (IQR)                                                       | 1.33 (0.16, 3.07)                  | 0.92 (0.13, 2.24)                     | 0.77           |
| Previous chemotherapy, n (%)                                                              | 3 (75.0%)                          | 50 (60.2%)                            | 0.36           |
| Previous hormonal therapy, n (%)                                                          | 0 (0.0%)                           | 1 (1.2%)                              | 0.95           |
| Previous radiation, n (%)                                                                 | 3 (75.0%)                          | 45 (54.2%)                            | 0.30           |
| Previous stem cell transplant, n (%)                                                      | 1 (25.0%)                          | 1 (1.2%)                              | 0.089          |
| Previous CAR-T therapy, n (%)                                                             | 0 (0.0%)                           | 0 (0.0%)                              | N/A            |
| Previous chemotherapy, hormonal therapy, radiation, stem cell transplant, or CAR-T, n (%) | 3 (75.0%)                          | 50 (60.2%)                            | 0.36           |

**Supplemental Table 6.** Cancer characteristics stratified by index date before 2016 vs. 2016 or later among non-RA comparators (n=87).

|                                                                                           | <b>Comparators before<br/>2016 (n=7)</b> | <b>Comparators 2016<br/>or later (n=196)</b> | <b>p-value</b> |
|-------------------------------------------------------------------------------------------|------------------------------------------|----------------------------------------------|----------------|
| Median cancer duration, years (IQR)                                                       | 0.63 (0.10, 6.02)                        | 0.51 (0.13, 1.77)                            | 0.25           |
| Previous chemotherapy, n (%)                                                              | 3 (42.9%)                                | 88 (44.9%)                                   | 0.30           |
| Previous hormonal therapy, n (%)                                                          | 0 (0.0%)                                 | 4 (2.0%)                                     | 0.87           |
| Previous radiation, n (%)                                                                 | 3 (42.9%)                                | 68 (34.7%)                                   | 0.27           |
| Previous stem cell transplant, n (%)                                                      | 0 (0.0%)                                 | 2 (1.0%)                                     | 0.93           |
| Previous CAR-T therapy, n (%)                                                             | 0 (0.0%)                                 | 1 (0.5%)                                     | 0.97           |
| Previous chemotherapy, hormonal therapy, radiation, stem cell transplant, or CAR-T, n (%) | 3 (42.9%)                                | 91 (46.4%)                                   | 0.29           |

**Supplemental Table 7.** Hazard ratios for mortality after immune checkpoint inhibitor initiation, comparing pre-existing RA cases (n=87) and matched non-RA comparators, index date before 2016 (n=203).

|                       | Deaths | Person-months | Incidence rate (95%CI) per 1000 person-months | Unadjusted HR (95%CI) | Multivariable* HR (95%CI) |
|-----------------------|--------|---------------|-----------------------------------------------|-----------------------|---------------------------|
| Pre-existing RA cases | 3      | 154.70        | 19.39 (0.00, 41.34)                           | 1.20 (0.29, 4.96)     | 1.16 (0.17, 7.96)         |
| Matched comparators   | 3      | 292.93        | 10.24 (0.00, 21.83)                           | 1.0 (Ref)             | 1.0 (Ref)                 |

\*In addition to matching factors of age, sex, calendar year, cancer type, target of ICI, adjusted for smoking pack-years, cancer duration, previous chemotherapy or hormonal therapy, previous radiation, previous stem cell transplant/CAR-T, and continuous Charlson Comorbidity Index.

CAR-T, chimeric antigen receptor T cells; CI, confidence interval; HR, hazard ratio; ICI, immune checkpoint inhibitor.

**Supplemental Table 8.** Hazard ratios for mortality after immune checkpoint inhibitor initiation, comparing pre-existing RA cases (n=87) and matched non-RA comparators, index date 2016 or later (n=203).

|                       | Deaths | Person-months | Incidence rate (95%CI) per 1000 person-months | Unadjusted HR (95%CI) | Multivariable* HR (95%CI) |
|-----------------------|--------|---------------|-----------------------------------------------|-----------------------|---------------------------|
| Pre-existing RA cases | 57     | 1,453.97      | 39.20 (29.03, 49.38)                          | 1.21 (0.89, 1.66)     | 1.16 (0.85, 1.58)         |
| Matched comparators   | 124    | 4,245.07      | 29.21 (24.07, 34.35)                          | 1.0 (Ref)             | 1.0 (Ref)                 |

\*In addition to matching factors of age, sex, calendar year, cancer type, target of ICI, adjusted for smoking pack-years, cancer duration, previous chemotherapy or hormonal therapy, previous radiation, previous stem cell transplant/CAR-T, and continuous Charlson Comorbidity Index.

CAR-T, chimeric antigen receptor T cells; CI, confidence interval; HR, hazard ratio; ICI, immune checkpoint inhibitor.

**Supplemental Table 9.** Glucocorticoid and DMARD use at any time after index date of ICI initiation.

| <b>DMARD</b>                 | <b>All RA cases<br/>(n=87)</b> | <b>Non-RA comparators<br/>(n=203)</b> | <b>p-value</b> |
|------------------------------|--------------------------------|---------------------------------------|----------------|
| Glucocorticoids (n, %)       | 62 (71.3%)                     | 94 (46.3%)                            | <0.0001        |
| DMARD (n, %)                 | 38 (43.7%)                     | 14 (6.9%)                             | <0.0001        |
| csDMARD (n, %)               | 33 (37.9%)                     | 9 (4.4%)                              | <0.0001        |
| azathioprine (n, %)          | 0 (0.0%)                       | 1 (0.5%)                              | 0.70           |
| methotrexate (n, %)          | 17 (19.5%)                     | 5 (2.5%)                              | <0.0001        |
| leflunomide (n, %)           | 3 (3.5%)                       | 0 (0.0%)                              | 0.026          |
| mycophenolic acid (n, %)     | 0 (0.0%)                       | 0 (0.0%)                              | N/A            |
| mycophenolate mofetil (n, %) | 1 (1.2%)                       | 0 (0.0%)                              | 0.30           |
| sulfasalazine (n, %)         | 3 (3.5%)                       | 1 (0.5%)                              | 0.075          |
| hydroxychloroquine (n, %)    | 16 (18.4%)                     | 3 (1.5%)                              | <0.0001        |
| tsDMARD (n, %)               | 1 (1.2%)                       | 0 (0.0%)                              | 0.30           |
| tofacitinib (n, %)           | 1 (1.2%)                       | 0 (0.0%)                              | 0.30           |
| baricitinib (n, %)           | 0 (0.0%)                       | 0 (0.0%)                              | N/A            |
| upadacitinib (n, %)          | 0 (0.0%)                       | 0 (0.0%)                              | N/A            |
| bDMARD (n, %)                | 8 (9.2%)                       | 7 (3.5%)                              | 0.043          |
| rituximab (n, %)             | 4 (4.6%)                       | 3 (1.5%)                              | 0.10           |
| abatacept (n, %)             | 0 (0.0%)                       | 0 (0.0%)                              | N/A            |
| Anakinra (n, %)              | 0 (0.0%)                       | 0 (0.0%)                              | N/A            |
| TNFi (n, %)                  | 4 (4.6%)                       | 4 (2.0%)                              | 0.14           |
| infliximab (n, %)            | 2 (2.3%)                       | 4 (2.0%)                              | 0.33           |
| etanercept (n, %)            | 2 (2.3%)                       | 0 (0.0%)                              | 0.089          |
| adalimumab (n, %)            | 0 (0.0%)                       | 0 (0.0%)                              | N/A            |
| certolizumab (n, %)          | 0 (0.0%)                       | 0 (0.0%)                              | N/A            |
| golimumab (n, %)             | 0 (0.0%)                       | 0 (0.0%)                              | N/A            |
| IL-6i (n, %)                 | 1 (1.2%)                       | 0 (0.0%)                              | 0.30           |
| tocilizumab (n, %)           | 1 (1.2%)                       | 0 (0.0%)                              | 0.30           |
| sarilumab (n, %)             | 0 (0.0%)                       | 0 (0.0%)                              | N/A            |

**Supplemental Figure 2.** Histogram comparing number of all-grade irAE for pre-existing RA cases and non-RA comparators after excluding RA flares for cases and IA events for comparators.

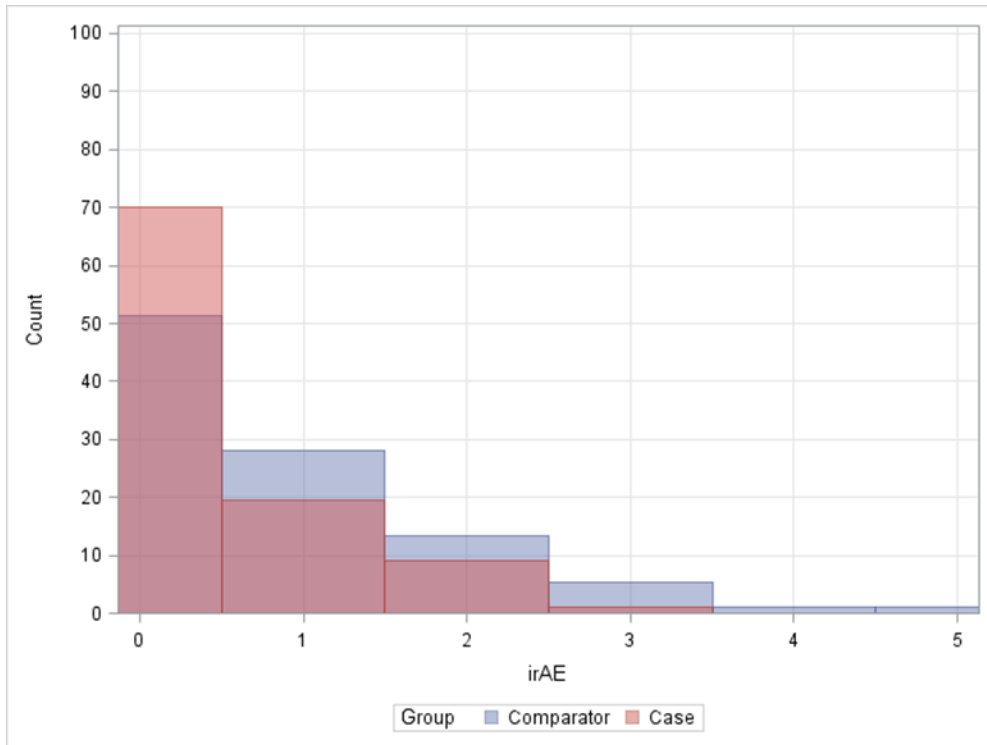

**Supplemental Table 10.** Hazard ratios for mortality after immune checkpoint inhibitor initiation by baseline factors.

|                               | <b>Deaths</b> | <b>Person-Months</b> | <b>Incidence rate (per 1000 person-months) and 95%CI</b> | <b>Unadjusted HR (95%CI)</b> | <b>Multivariable* HR (95%CI)</b> |
|-------------------------------|---------------|----------------------|----------------------------------------------------------|------------------------------|----------------------------------|
| Age (per year)                | 187           | 6,146.67             | 30.42 (26.06, 34.78)                                     | 1.02 (1.00, 1.03)            | 1.02 (1.00, 1.04)                |
| Sex                           |               |                      |                                                          |                              |                                  |
| Male                          | 72            | 2,503.33             | 28.76 (22.12, 35.41)                                     | 0.96 (0.72, 1.30)            | 1.31 (0.91, 1.87)                |
| Female                        | 115           | 3,643.33             | 31.56 (25.80, 37.33)                                     | 1.0 (Ref)                    | 1.0 (Ref)                        |
| Cancer type                   |               |                      |                                                          |                              |                                  |
| Lung                          | 108           | 2,996.63             | 36.04 (29.24, 42.84)                                     | 1.0 (Ref)                    | 1.0 (Ref)                        |
| Melanoma                      | 29            | 2,175.13             | 13.33 (8.48, 18.19)                                      | 0.42 (0.28, 0.64)            | 0.45 (0.27, 0.75)                |
| Other                         | 50            | 974.9                | 51.29 (37.07, 65.50)                                     | 1.31 (0.94, 1.82)            | 1.28 (0.85, 1.92)                |
| Smoking Pack years (per unit) | 187           | 6,146.67             | 30.42 (26.06, 34.78)                                     | 1.01 (1.00, 1.01)            | 1.00 (1.00, 1.01)                |
| Cancer duration (per year)    | 187           | 6,146.67             | 30.42 (26.06, 34.78)                                     | 1.00 (0.93, 1.08)            | 0.99 (0.90, 1.10)                |
| Previous cancer treatment     |               |                      |                                                          |                              |                                  |
| No                            | 75            | 3,397.1              | 22.08 (17.08, 27.07)                                     | 1.0 (Ref)                    | 1.0 (Ref)                        |
| Yes                           | 112           | 2,749.57             | 40.73 (33.19, 48.28)                                     | 1.74 (1.30, 2.34)            | 1.39 (0.97, 1.97)                |
| Continuous CCI (per unit)     | 187           | 6,146.67             | 30.42 (26.06, 34.78)                                     | 1.06 (1.02, 1.09)            | 1.05 (1.01, 1.09)                |

\*Adjusted for all listed variables in the rows.

**Supplemental Table 11.** Hazard ratios for mortality after immune checkpoint inhibitor initiation comparing RA cases and matched comparators among only males.

|                     | Deaths | Person-Months | Incidence rate (per 1000 person-months) and 95%CI | Unadjusted HR (95%CI) | Multivariable* HR (95%CI) |
|---------------------|--------|---------------|---------------------------------------------------|-----------------------|---------------------------|
| RA cases            | 23     | 720.87        | 31.91 (18.87, 44.95)                              | 1.15 (0.70, 1.88)     | 1.11 (0.67, 1.84)         |
| Matched comparators | 49     | 1,782.47      | 27.49 (19.79, 35.19)                              | 1.0 (Ref)             | 1.0 (Ref)                 |

\*In addition to matching factors of age, calendar year, cancer type, target of ICI, adjusted for smoking pack-years, cancer duration, previous chemotherapy or hormonal therapy, previous radiation, previous stem cell transplant/CAR-T, and continuous Charlson comorbidity index.

**Supplemental Table 12.** Hazard ratios for mortality after immune checkpoint inhibitor initiation comparing RA cases and matched comparators among only females.

|                     | Deaths | Person-Months | Incidence rate (per 1000 person-months) and 95%CI | Unadjusted HR (95%CI) | Multivariable* HR (95%CI) |
|---------------------|--------|---------------|---------------------------------------------------|-----------------------|---------------------------|
| RA cases            | 37     | 887.8         | 41.68 (28.25, 55.10)                              | 1.29 (0.88, 1.88)     | 1.19 (0.80, 1.78)         |
| Matched comparators | 78     | 2,755.53      | 28.31 (22.02, 34.59)                              | 1.0 (Ref)             | 1.0 (Ref)                 |

\*In addition to matching factors of age, calendar year, cancer type, target of ICI, adjusted for smoking pack-years, cancer duration, previous chemotherapy or hormonal therapy, previous radiation, previous stem cell transplant/CAR-T, and continuous Charlson comorbidity index.

**Supplemental Table 13.** Hazard ratios for mortality after immune checkpoint inhibitor initiation comparing RA cases and matched comparators among only lung cancer.

|                     | Deaths | Person-Months | Incidence rate (per 1000 person-months) and 95%CI | Unadjusted HR (95%CI) | Multivariable* HR (95%CI) |
|---------------------|--------|---------------|---------------------------------------------------|-----------------------|---------------------------|
| RA cases            | 33     | 688.1         | 47.96 (31.60, 64.32)                              | 1.31 (0.88, 1.95)     | 1.22 (0.81, 1.84)         |
| Matched comparators | 75     | 2,308.53      | 32.49 (25.14, 39.84)                              | 1.0 (Ref)             | 1.0 (Ref)                 |

\*In addition to matching factors of age, sex, calendar year, cancer type, target of ICI, adjusted for smoking pack-years, cancer duration, previous chemotherapy or hormonal therapy, previous radiation, previous stem cell transplant/CAR-T, and continuous Charlson comorbidity index.

**Supplemental Table 14.** Hazard ratios for mortality after immune checkpoint inhibitor initiation comparing RA cases and matched comparators among only melanoma.

|                     | Deaths | Person-months | Incidence rate (per 1000 person-months) and 95%CI | Unadjusted HR (95%CI) | Multivariable* HR (95%CI) |
|---------------------|--------|---------------|---------------------------------------------------|-----------------------|---------------------------|
| RA cases            | 10     | 556.43        | 17.97 (6.83, 29.11)                               | 1.47 (0.70, 3.10)     | 2.12 (0.88, 5.07)         |
| Matched comparators | 19     | 1,618.7       | 11.74 (6.46, 17.02)                               | 1.0 (Ref)             | 1.0 (Ref)                 |

\*In addition to matching factors of age, sex, calendar year, cancer type, target of ICI, adjusted for smoking pack-years, cancer duration, previous chemotherapy or hormonal therapy, previous radiation, previous stem cell transplant/CAR-T, and continuous Charlson comorbidity index.

**Supplemental Table 15.** Hazard ratios for mortality after immune checkpoint inhibitor initiation comparing RA cases and matched comparators among only seropositive RA cases and their comparators.

|                     | Deaths | Person-months | Incidence rate (per 1000 person-months) and 95%CI | Unadjusted HR (95%CI) | Multivariable* HR (95%CI) |
|---------------------|--------|---------------|---------------------------------------------------|-----------------------|---------------------------|
| RA cases            | 35     | 872.63        | 40.11 (26.82, 53.40)                              | 1.15 (0.77, 1.72)     | 1.03 (0.70, 1.50)         |
| Matched comparators | 83     | 2,462.43      | 33.71 (26.45, 40.96)                              | 1.0 (Ref)             | 1.0 (Ref)                 |

\*In addition to matching factors of age, sex, calendar year, cancer type, target of ICI, adjusted for smoking pack-years, cancer duration, previous chemotherapy or hormonal therapy, previous radiation, previous stem cell transplant/CAR-T, and continuous Charlson comorbidity index.

**Supplemental Table 16.** Hazard ratios for mortality after immune checkpoint inhibitor initiation comparing RA cases and matched comparators among only seronegative RA cases and their comparators.

|                     | Deaths | Person-months | Incidence rate (per 1000 person-months) and 95%CI | Unadjusted HR (95%CI) | Multivariable* HR (95%CI) |
|---------------------|--------|---------------|---------------------------------------------------|-----------------------|---------------------------|
| RA cases            | 14     | 543.5         | 25.76 (12.27, 39.25)                              | 1.05 (0.58, 1.91)     | 1.04 (0.55, 1.98)         |
| Matched comparators | 25     | 1,056.47      | 23.66 (14.39, 32.94)                              | 1.0 (Ref)             | 1.0 (Ref)                 |

\*In addition to matching factors of age, sex, calendar year, cancer type, target of ICI, adjusted for smoking pack-years, cancer duration, previous chemotherapy or hormonal therapy, previous radiation, previous stem cell transplant/CAR-T, and continuous Charlson comorbidity index.



**Supplemental Table 17.** Hazard ratios for mortality after immune checkpoint inhibitor initiation comparing RA cases and matched comparators only among baseline glucocorticoids users (n=57) and their comparators.

|                     | Deaths | Person-Months | Incidence rate (per 1000 person-months) and 95%CI | Unadjusted HR (95%CI) | Multivariable* HR (95%CI) |
|---------------------|--------|---------------|---------------------------------------------------|-----------------------|---------------------------|
| RA cases            | 43     | 904.60        | 47.53 (33.33, 61.74)                              | 1.33 (0.93, 1.90)     | 1.16 (0.81, 1.67)         |
| Matched comparators | 88     | 2,903.70      | 30.31 (23.97, 36.64)                              | 1.0 (Ref)             | 1.0 (Ref)                 |

\*In addition to matching factors of age, calendar year, cancer type, target of ICI, adjusted for smoking pack-years, cancer duration, previous chemotherapy or hormonal therapy, previous radiation, previous stem cell transplant/CAR-T, and continuous Charlson comorbidity index.

**Supplemental Table 18.** Hazard ratios for mortality after immune checkpoint inhibitor initiation comparing RA cases and matched comparators only among baseline non-glucocorticoids users (n=30) and their comparators.

|                     | Deaths | Person-Months | Incidence rate (per 1000 person-months) and 95%CI | Unadjusted HR (95%CI) | Multivariable* HR (95%CI) |
|---------------------|--------|---------------|---------------------------------------------------|-----------------------|---------------------------|
| RA cases            | 17     | 704.07        | 24.15 (12.67, 35.62)                              | 1.02 (0.58, 1.80)     | 1.03 (0.57, 1.88)         |
| Matched comparators | 39     | 1,634.3       | 23.86 (16.37, 31.35)                              | 1.0 (Ref)             | 1.0 (Ref)                 |

\*In addition to matching factors of age, calendar year, cancer type, target of ICI, adjusted for smoking pack-years, cancer duration, previous chemotherapy or hormonal therapy, previous radiation, previous stem cell transplant/CAR-T, and continuous Charlson comorbidity index.

**Supplemental Table 19.** Risk of all-grade irAE after immune checkpoint inhibitor initiation only among baseline glucocorticoids users (n=57) and their comparators.

|                     | All-grade irAE cases | Person-months | Incidence rate (per 1000 person-months) and 95%CI | Unadjusted Cox HR (95%CI) | Adjusted Cox HR (95%CI) | Unadjusted competing risk sdHR (95%CI) | Adjusted competing risk sdHR (95%CI) |
|---------------------|----------------------|---------------|---------------------------------------------------|---------------------------|-------------------------|----------------------------------------|--------------------------------------|
| RA cases            | 21                   | 193.93        | 108.28 (61.97, 154.60)                            | 1.86 (1.07, 3.25)         | 2.19 (1.22, 3.95)       | 2.02 (1.15, 3.54)                      | 2.38 (1.31, 4.31)                    |
| Matched comparators | 36                   | 901.53        | 39.93 (26.89, 52.98)                              | 1.0 (Ref)                 | 1.0 (Ref)               | 1.0 (Ref)                              | 1.0 (Ref)                            |

\*In addition to matching factors of age, calendar year, cancer type, target of ICI, adjusted for smoking pack-years, cancer duration, previous chemotherapy or hormonal therapy, previous radiation, previous stem cell transplant/CAR-T, and continuous Charlson comorbidity index.

**Supplemental Table 20.** Risk of all-grade irAE after immune checkpoint inhibitor initiation only among baseline non-glucocorticoids users (n=30) and their comparators.

|                     | All-grade irAE cases | Person-months | Incidence rate (per 1000 person-months) and 95%CI | Unadjusted Cox HR (95%CI) | Adjusted Cox HR (95%CI) | Unadjusted competing risk sdHR (95%CI) | Adjusted competing risk sdHR (95%CI) |
|---------------------|----------------------|---------------|---------------------------------------------------|---------------------------|-------------------------|----------------------------------------|--------------------------------------|
| RA cases            | 16                   | 325.07        | 49.22 (25.10, 73.34)                              | 1.04 (0.57, 1.88)         | 1.17 (0.62, 2.19)       | 1.08 (0.60, 1.95)                      | 1.22 (0.65, 2.28)                    |
| Matched comparators | 37                   | 893.10        | 41.43 (28.08, 54.78)                              | 1.0 (Ref)                 | 1.0 (Ref)               | 1.0 (Ref)                              | 1.0 (Ref)                            |

\*In addition to matching factors of age, calendar year, cancer type, target of ICI, adjusted for smoking pack-years, cancer duration, previous chemotherapy or hormonal therapy, previous radiation, previous stem cell transplant/CAR-T, and continuous Charlson comorbidity index.

**Supplemental Table 21.** Risk of all-grade irAE after immune checkpoint inhibitor initiation only among RA cases with moderate/high disease activity (n=14) as baseline (and their comparators).

|                     | All-grade irAE cases | Person-months | Incidence rate (per 1000 person-months) and 95%CI | Unadjusted Cox HR (95%CI) | Adjusted Cox HR (95%CI) | Unadjusted competing risk sdHR (95%CI) | Adjusted competing risk sdHR (95%CI) |
|---------------------|----------------------|---------------|---------------------------------------------------|---------------------------|-------------------------|----------------------------------------|--------------------------------------|
| RA cases            | 9                    | 22.30         | 403.59 (139.91, 667.26)                           | 2.56 (1.02, 6.43)         | 3.73 (1.17, 11.87)      | 3.69 (1.40, 9.72)                      | 7.95 (2.30, 27.50)                   |
| Matched comparators | 13                   | 279.53        | 46.51 (21.23, 71.79)                              | 1.0 (Ref)                 | 1.0 (Ref)               | 1.0 (Ref)                              | 1.0 (Ref)                            |

\*In addition to matching factors of age, calendar year, cancer type, target of ICI, adjusted for smoking pack-years, cancer duration, previous chemotherapy or hormonal therapy, previous radiation, previous stem cell transplant/CAR-T, and continuous Charlson comorbidity index.

**Supplemental Table 22.** Risk of all-grade irAE after immune checkpoint inhibitor initiation only among RA cases with remission/low disease activity (n=54) as baseline (and their comparators).

|                     | All-grade irAE cases | Person-months | Incidence rate (per 1000 person-months) and 95%CI | Unadjusted Cox HR (95%CI) | Adjusted Cox HR (95%CI) | Unadjusted competing risk sdHR (95%CI) | Adjusted competing risk sdHR (95%CI) |
|---------------------|----------------------|---------------|---------------------------------------------------|---------------------------|-------------------------|----------------------------------------|--------------------------------------|
| RA cases            | 37                   | 373.70        | 99.01 (67.11, 130.91)                             | 1.91 (1.25, 2.92)         | 1.97 (1.29, 3.02)       | 1.97 (1.28, 3.04)                      | 2.12 (1.38, 3.26)                    |
| Matched comparators | 62                   | 1,377.67      | 45.00 (33.80, 56.21)                              | 1.0 (Ref)                 | 1.0 (Ref)               | 1.0 (Ref)                              | 1.0 (Ref)                            |

\*In addition to matching factors of age, calendar year, cancer type, target of ICI, adjusted for smoking pack-years, cancer duration, previous chemotherapy or hormonal therapy, previous radiation, previous stem cell transplant/CAR-T, and continuous Charlson comorbidity index.

**Supplemental Table 23.** Risk of all-grade irAE after immune checkpoint inhibitor initiation only among males.

|                     | <b>All-grade irAE cases</b> | <b>Person-months</b> | <b>Incidence rate (per 1000 person-months) and 95%CI</b> | <b>Unadjusted Cox HR (95%CI)</b> | <b>Adjusted Cox HR (95%CI)</b> | <b>Unadjusted competing risk sdHR (95%CI)</b> | <b>Adjusted competing risk sdHR (95%CI)</b> |
|---------------------|-----------------------------|----------------------|----------------------------------------------------------|----------------------------------|--------------------------------|-----------------------------------------------|---------------------------------------------|
| RA cases            | 24                          | 277.6                | 86.46 (51.87, 121.04)                                    | 2.08 (1.23, 3.52)                | 2.78 (1.57, 4.93)              | 2.34 (1.39, 3.96)                             | 3.06 (1.68, 5.55)                           |
| Matched comparators | 37                          | 1,183.03             | 31.28 (21.20, 41.35)                                     | 1.0 (Ref)                        | 1.0 (Ref)                      | 1.0 (Ref)                                     | 1.0 (Ref)                                   |

\*In addition to matching factors of age, calendar year, cancer type, target of ICI, adjusted for smoking pack-years, cancer duration, previous chemotherapy or hormonal therapy, previous radiation, previous stem cell transplant/CAR-T, and continuous Charlson comorbidity index.

**Supplemental Table 24.** Risk of all-grade irAE after immune checkpoint inhibitor initiation only among females.

|                     | <b>All-grade irAE cases</b> | <b>Person-months</b> | <b>Incidence rate (per 1000 person-months) and 95%CI</b> | <b>Unadjusted Cox HR (95%CI)</b> | <b>Adjusted Cox HR (95%CI)</b> | <b>Unadjusted competing risk sdHR (95%CI)</b> | <b>Adjusted competing risk sdHR (95%CI)</b> |
|---------------------|-----------------------------|----------------------|----------------------------------------------------------|----------------------------------|--------------------------------|-----------------------------------------------|---------------------------------------------|
| RA cases            | 29                          | 305.73               | 94.85 (60.33, 129.38)                                    | 1.39 (0.87, 2.21)                | 1.56 (0.97, 2.52)              | 1.60 (1.00, 2.56)                             | 1.82 (1.13, 2.94)                           |
| Matched comparators | 62                          | 1,291.83             | 47.99 (36.05, 59.94)                                     | 1.0 (Ref)                        | 1.0 (Ref)                      | 1.0 (Ref)                                     | 1.0 (Ref)                                   |

\*In addition to matching factors of age, calendar year, cancer type, target of ICI, adjusted for smoking pack-years, cancer duration, previous chemotherapy or hormonal therapy, previous radiation, previous stem cell transplant/CAR-T, and continuous Charlson comorbidity index.

**Supplemental Table 25.** Risk of grade 3+ irAE after immune checkpoint inhibitor initiation only among males.

|                     | <b>Grade 3+ irAE cases</b> | <b>Person-months</b> | <b>Incidence rate (per 1000 person-months) and 95%CI</b> | <b>Unadjusted Cox HR (95%CI)</b> | <b>Adjusted Cox HR (95%CI)</b> | <b>Unadjusted competing risk sdHR (95%CI)</b> | <b>Adjusted competing risk sdHR (95%CI)</b> |
|---------------------|----------------------------|----------------------|----------------------------------------------------------|----------------------------------|--------------------------------|-----------------------------------------------|---------------------------------------------|
| RA cases            | 7                          | 587.03               | 11.92 (3.09, 20.76)                                      | 0.91 (0.38, 2.22)                | 1.23 (0.45, 3.36)              | 1.00 (0.41, 2.45)                             | 1.47 (0.51, 4.27)                           |
| Matched comparators | 18                         | 1,504.4              | 11.96 (6.44, 17.49)                                      | 1.0 (Ref)                        | 1.0 (Ref)                      | 1.0 (Ref)                                     | 1.0 (Ref)                                   |

\*In addition to matching factors of age, calendar year, cancer type, target of ICI, adjusted for smoking pack-years, cancer duration, previous chemotherapy or hormonal therapy, previous radiation, previous stem cell transplant/CAR-T, and continuous Charlson comorbidity index.

**Supplemental Table 26.** Risk of grade 3+ irAE after immune checkpoint inhibitor initiation only among females.

|                     | <b>Grade 3+ irAE cases</b> | <b>Person-months</b> | <b>Incidence rate (per 1000 person-months) and 95%CI</b> | <b>Unadjusted Cox HR (95%CI)</b> | <b>Adjusted Cox HR (95%CI)</b> | <b>Unadjusted competing risk sdHR (95%CI)</b> | <b>Adjusted competing risk sdHR (95%CI)</b> |
|---------------------|----------------------------|----------------------|----------------------------------------------------------|----------------------------------|--------------------------------|-----------------------------------------------|---------------------------------------------|
| RA cases            | 5                          | 807.43               | 6.19 (0.76, 11.62)                                       | 0.99 (0.35, 2.82)                | 1.39 (0.46, 4.18)              | 1.01 (0.36, 2.88)                             | 1.49 (0.50, 4.47)                           |
| Matched comparators | 12                         | 2,536.77             | 4.73 (2.05, 7.41)                                        | 1.0 (Ref)                        | 1.0 (Ref)                      | 1.0 (Ref)                                     | 1.0 (Ref)                                   |

\*In addition to matching factors of age, calendar year, cancer type, target of ICI, adjusted for smoking pack-years, cancer duration, previous chemotherapy or hormonal therapy, previous radiation, previous stem cell transplant/CAR-T, and continuous Charlson comorbidity index.

**Supplemental Table 27.** Risk of all-grade irAE after immune checkpoint inhibitor initiation excluding RA and flare and IA, only among males.

|                     | All-grade irAE cases | Person-months | Incidence rate (per 1000 person-months) and 95%CI | Unadjusted Cox HR (95%CI) | Adjusted Cox HR (95%CI) | Unadjusted competing risk sdHR (95%CI) | Adjusted competing risk sdHR (95%CI) |
|---------------------|----------------------|---------------|---------------------------------------------------|---------------------------|-------------------------|----------------------------------------|--------------------------------------|
| RA cases            | 14                   | 403.1         | 34.73 (16.54, 52.92)                              | 0.88 (0.47, 1.67)         | 1.01 (0.53, 1.95)       | 0.99 (0.52, 1.88)                      | 1.08 (0.55, 2.11)                    |
| Matched comparators | 37                   | 1,187.23      | 31.16 (21.12, 41.21)                              | 1.0 (Ref)                 | 1.0 (Ref)               | 1.0 (Ref)                              | 1.0 (Ref)                            |

\*In addition to matching factors of age, calendar year, cancer type, target of ICI, adjusted for smoking pack-years, cancer duration, previous chemotherapy or hormonal therapy, previous radiation, previous stem cell transplant/CAR-T, and continuous Charlson comorbidity index.

**Supplemental Table 28.** Risk of all-grade irAE after immune checkpoint inhibitor initiation excluding RA and flare and IA, only among females.

|                     | All-grade irAE cases | Person-months | Incidence rate (per 1000 person-months) and 95%CI | Unadjusted Cox HR (95%CI) | Adjusted Cox HR (95%CI) | Unadjusted competing risk sdHR (95%CI) | Adjusted competing risk sdHR (95%CI) |
|---------------------|----------------------|---------------|---------------------------------------------------|---------------------------|-------------------------|----------------------------------------|--------------------------------------|
| RA cases            | 12                   | 638.93        | 18.78 (8.15, 29.41)                               | 0.39 (0.21, 0.74)         | 0.47 (0.24, 0.93)       | 0.40 (0.21, 0.76)                      | 0.49 (0.25, 0.97)                    |
| Matched comparators | 62                   | 1,296.37      | 47.83 (35.92, 59.73)                              | 1.0 (Ref)                 | 1.0 (Ref)               | 1.0 (Ref)                              | 1.0 (Ref)                            |

\*In addition to matching factors of age, calendar year, cancer type, target of ICI, adjusted for smoking pack-years, cancer duration, previous chemotherapy or hormonal therapy, previous radiation, previous stem cell transplant/CAR-T, and continuous Charlson comorbidity index.

**Supplemental Table 29.** Risk of grade 3+ irAE after immune checkpoint inhibitor initiation excluding RA and flare and IA, only among males.

|                     | <b>Grade 3+ irAE cases</b> | <b>Person-months</b> | <b>Incidence rate (per 1000 person-months) and 95%CI</b> | <b>Unadjusted Cox HR (95%CI)</b> | <b>Adjusted Cox HR (95%CI)</b> | <b>Unadjusted competing risk sdHR (95%CI)</b> | <b>Adjusted competing risk sdHR (95%CI)</b> |
|---------------------|----------------------------|----------------------|----------------------------------------------------------|----------------------------------|--------------------------------|-----------------------------------------------|---------------------------------------------|
| RA cases            | 6                          | 598.5                | 10.03 (2.00, 18.05)                                      | 0.76 (0.30, 1.94)                | 0.94 (0.35, 2.55)              | 0.83 (0.32, 2.15)                             | 1.07 (0.37, 3.09)                           |
| Matched comparators | 18                         | 1,504.4              | 11.96 (6.44, 17.49)                                      | 1.0 (Ref)                        | 1.0 (Ref)                      | 1.0 (Ref)                                     | 1.0 (Ref)                                   |

\*In addition to matching factors of age, calendar year, cancer type, target of ICI, adjusted for smoking pack-years, cancer duration, previous chemotherapy or hormonal therapy, previous radiation, previous stem cell transplant/CAR-T, and continuous Charlson comorbidity index.

**Supplemental Table 30.** Risk of grade 3+ irAE after immune checkpoint inhibitor initiation excluding RA and flare and IA, only among females.

|                     | <b>Grade 3+ irAE cases</b> | <b>Person-months</b> | <b>Incidence rate (per 1000 person-months) and 95%CI</b> | <b>Unadjusted Cox HR (95%CI)</b> | <b>Adjusted Cox HR (95%CI)</b> | <b>Unadjusted competing risk sdHR (95%CI)</b> | <b>Adjusted competing risk sdHR (95%CI)</b> |
|---------------------|----------------------------|----------------------|----------------------------------------------------------|----------------------------------|--------------------------------|-----------------------------------------------|---------------------------------------------|
| RA cases            | 5                          | 807.43               | 6.19 (0.76, 11.62)                                       | 0.99 (0.35, 2.82)                | 1.39 (0.46, 4.18)              | 1.01 (0.36, 2.88)                             | 1.49 (0.50, 4.47)                           |
| Matched comparators | 12                         | 2,536.77             | 4.73 (2.05, 7.41)                                        | 1.0 (Ref)                        | 1.0 (Ref)                      | 1.0 (Ref)                                     | 1.0 (Ref)                                   |

\*In addition to matching factors of age, calendar year, cancer type, target of ICI, adjusted for smoking pack-years, cancer duration, previous chemotherapy or hormonal therapy, previous radiation, previous stem cell transplant/CAR-T, and continuous Charlson comorbidity index.
